# Supplementary material for: Unraveling the catalytic mechanism of SARS-CoV-2 papain-like protease with allosteric modulation of C270 mutation using multiscale computational approaches
Source: Royal Society of Chemistry journal article supplement (doi:10.1039/d3sc00166k), 2023-01-01
Supplement: d3sc00166k1.pdf [file d3sc00166k1.pdf]

## Supplementary Information

### **Unraveling the Catalytic Mechanism of SARS-CoV-2 Papain-like Protease with Allosteric Modulation of C270 Mutation Using Multiscale Computational Approaches**

Qiang Shao<sup>a,b\*</sup>, Muya Xiong<sup>a,b</sup>, Jiameng Li<sup>c</sup>, Hangchen Hu<sup>d</sup>, Haixia Su<sup>a</sup>, Yechun  
Xu<sup>a,b,c,d\*</sup>

<sup>a</sup>CAS Key Laboratory of Receptor Research and State Key Laboratory of Drug Research, Shanghai Institute of Materia Medica, Chinese Academy of Sciences, Shanghai 201203, China

<sup>b</sup>University of Chinese Academy of Sciences, Beijing 100049, China

<sup>c</sup>School of Chinese Materia Medica, Nanjing University of Chinese Medicine, Nanjing 210023, China

<sup>d</sup>School of Pharmaceutical Science and Technology, Hangzhou Institute for Advanced Study, University of Chinese Academy of Sciences, Hangzhou 310024, China

\*Corresponding Email: qshao@simm.ac.cn (Q. Shao); ycxu@simm.ac.cn (Y. Xu)

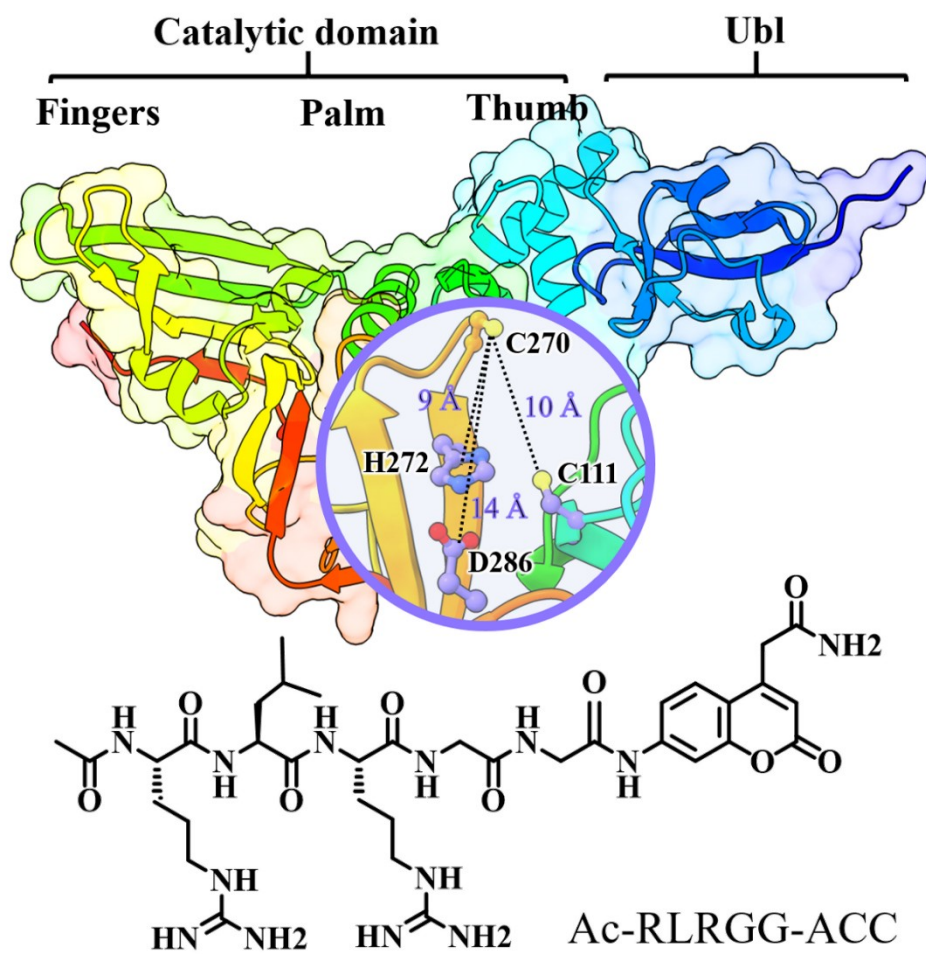

**Fig. S1** Structures of SARS-CoV-2 PL<sup>pro</sup> and the pentapeptide substrate studied in the present study. An expanded view is provided for C270 at BL2 loop and the catalytic triad C111-H272-D286. The dash lines represent sidechain distances between C270 and three catalytic residues.

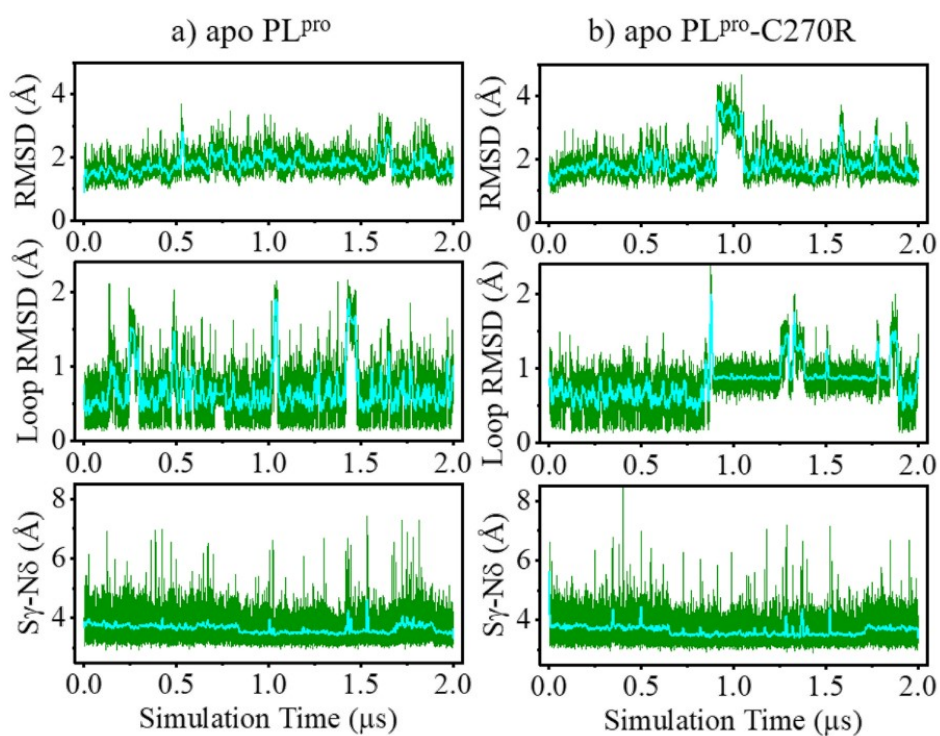

**Fig. S2** GaMD simulation trajectories of apo structures of (a) the wild-type SARS-CoV-2 PL<sup>pro</sup> (apo PL<sup>pro</sup>) and (b) C270R mutant (apo PL<sup>pro</sup>-C270R) as indicated by the time series of the main chain root-mean-square deviations (RMSDs) of protein and BL2 loop, and the distance between C111-S $\gamma$  and H272-N $\delta$  atoms (S $\gamma$ -N $\delta$ ), respectively (from top to bottom).

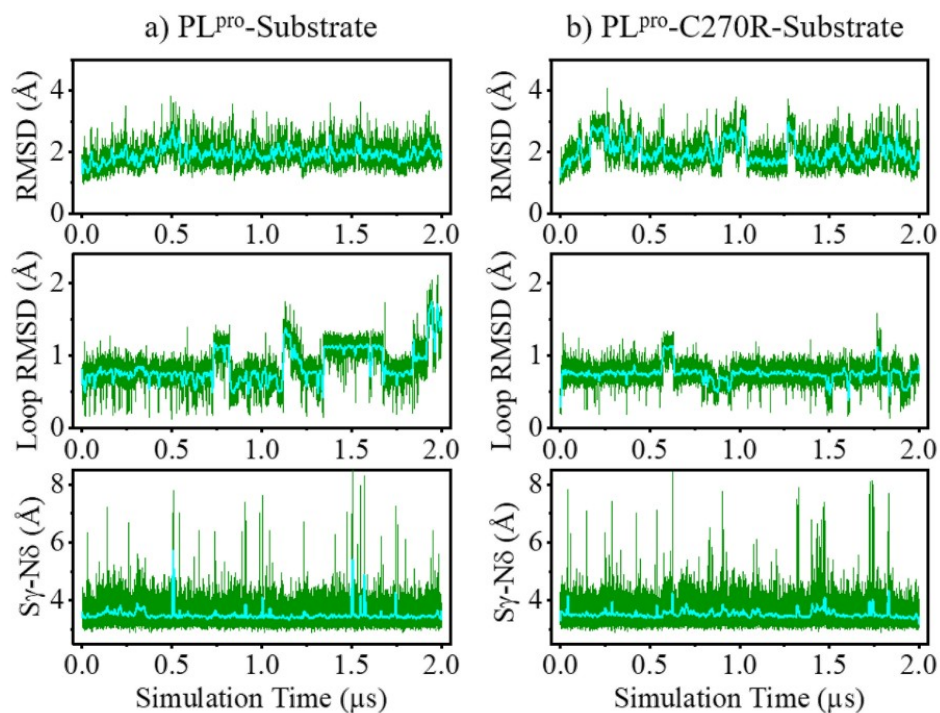

**Fig. S3** GaMD simulation trajectories of the substrate (Ac-RLRGG-ACC)-bound structures of (a) the wild-type SARS-CoV-2 PL<sup>pro</sup> (PL<sup>pro</sup>-Substrate) and (b) C270R mutant (PL<sup>pro</sup>-C270R-Substrate) as indicated by the time series of the main chain RMSDs of protein and BL2 loop, and the distance between C111-S $\gamma$  and H272-N $\delta$  atoms, respectively (from top to bottom).

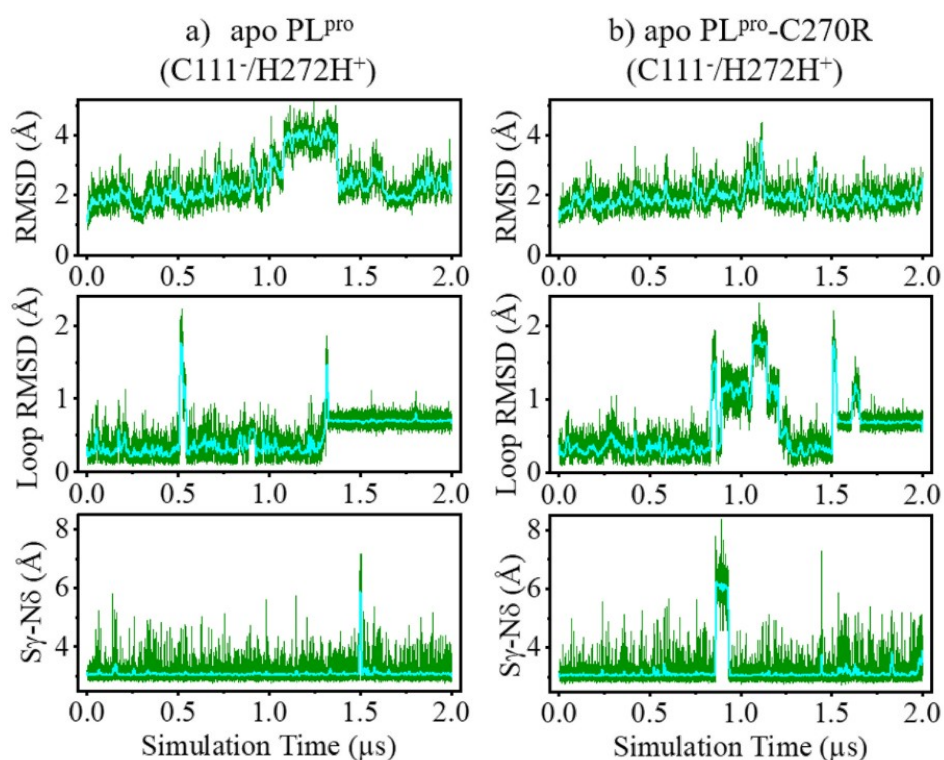

**Fig. S4** GaMD simulation trajectories of apo structures of (a) the wild-type SARS-CoV-2 PL<sup>pro</sup> and (b) C270R mutant containing ion pair form of C111-/H272H<sup>+</sup>. The trajectories are represented by the time series of the main chain RMSDs of protein and BL2 loop, and the distance between C111-S $\gamma$  and H272-N $\delta$  atoms, respectively (from top to bottom).

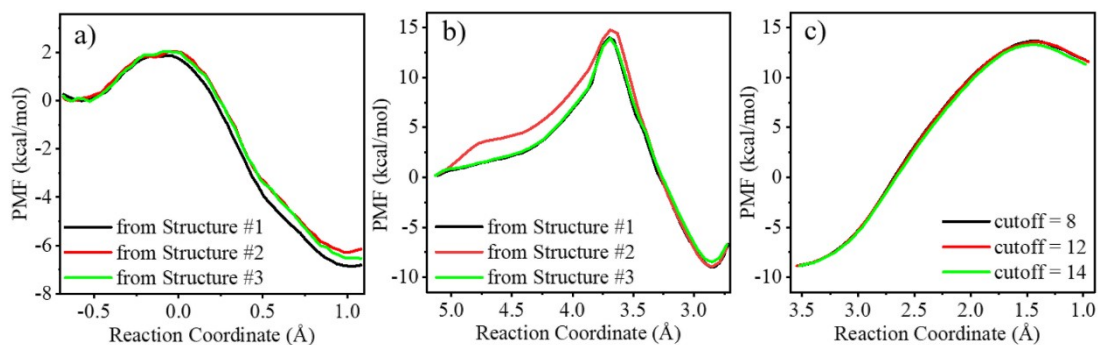

**Fig. S5** The evaluation of simulation factors affecting QM/MM results. (a-b) QM/MM free energy profiles associated with (a) the C111-H272 proton transfer in apo wild-type SARS-CoV-2 PL<sup>pro</sup> and (b) the acylation reaction in substrate-bound wild-type PL<sup>pro</sup> using different initial structures. (c) QM/MM free energy profile associated with the E-I1 → E-I2 substep of deacylation reaction in substrate-bound wild-type SARS-CoV-2 PL<sup>pro</sup> calculated using multiple cutoff values.

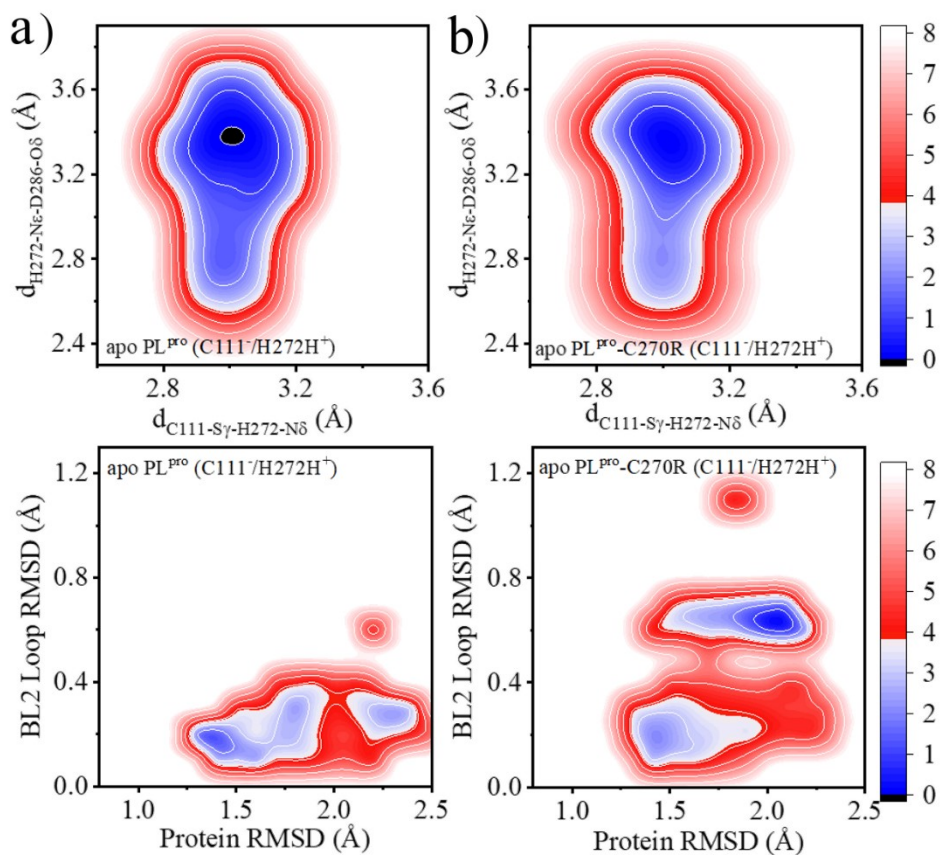

**Fig. S6** Free energy landscapes (FELs) along the collective variables of the distance between C111-S $\gamma$  and H272-N $\delta$  ( $d_{\text{C111-S}\gamma\text{-H272-N}\delta}$ ) and the distance between H272-N $\epsilon$  and D286-O $\delta$  ( $d_{\text{H272-N}\epsilon\text{-D286-O}\delta}$ ), the main chain RMSDs of protein and BL2 loop for GaMD simulations of apo (a) wild-type SARS-CoV-2 PL<sup>pro</sup> and (b) C270R mutant containing ion pair form of C111/H272H<sup>+</sup>. The contours in the two-dimensional subspace are spaced at intervals of 1.0 kcal/mol.

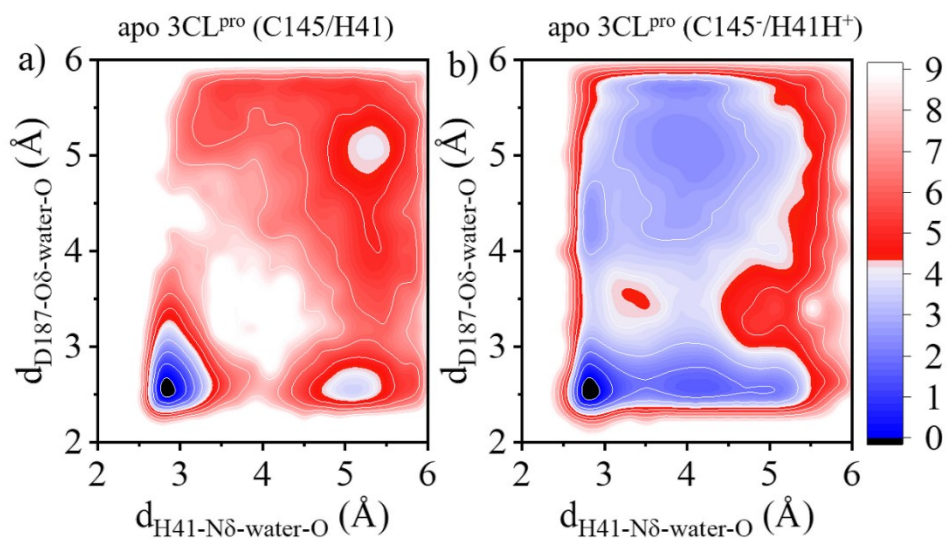

**Fig. S7** FELs along the distance between H41-N $\delta$  and the oxygen of the crystal water ( $d_{\text{H272-N}\delta\text{-water-O}}$ ) and the distance between D187-O $\delta$  and the oxygen of the crystal water ( $d_{\text{D286-O}\delta\text{-water-O}}$ ) for conventional MD simulations of apo SARS-CoV-2 3CL<sup>pro</sup> containing either (a) the neutral form or (b) ion pair of the catalytic H41 and C145. The contours in the two-dimensional subspace are spaced at intervals of 1.0 kcal/mol.



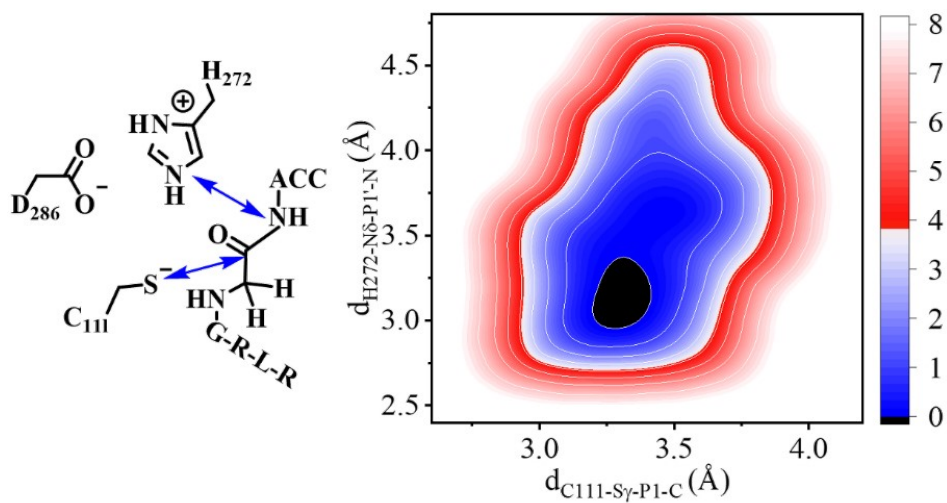

**Fig. S8** FELs along the distance between C111-S<sub>γ</sub> and P1-C atoms, and the distance between H272-N<sub>δ</sub> and P1'-N atoms for the GaMD simulation of substrate-bound wild-type SARS-CoV-2 PL<sup>pro</sup>. The contours in the two-dimensional subspace are spaced at intervals of 1.0 kcal/mol.

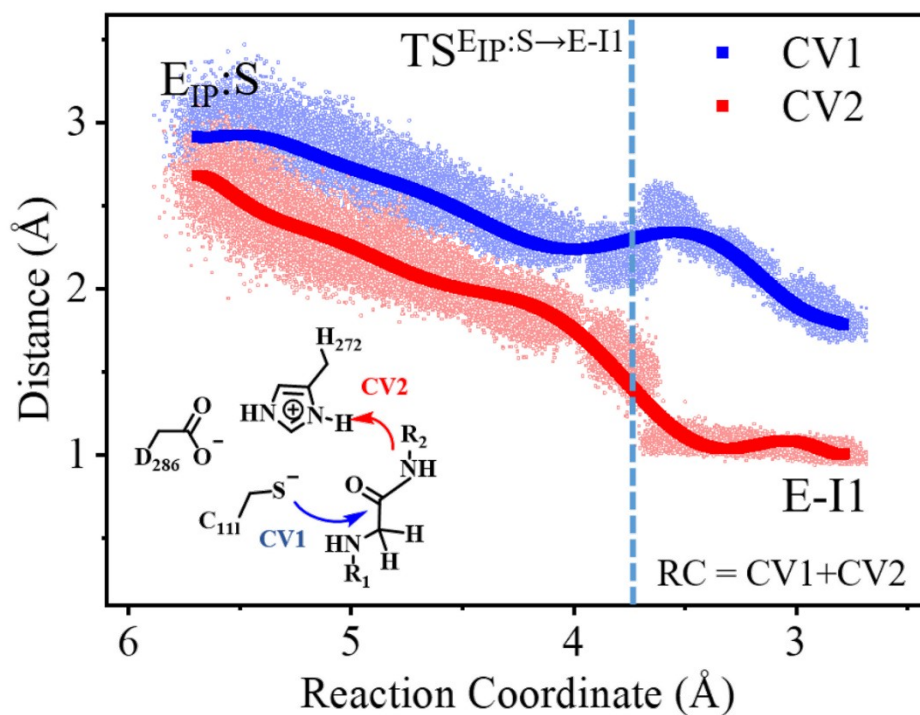

**Fig. S9** Evolution of the distances selected as the collective variables (CVs) along the reaction coordinate of the acylation transition ( $E_{IP:S} \rightarrow E-I1$ ) in SARS-CoV-2 PL<sup>pro</sup>. CV1:  $d_{C111-S\gamma-P1-C}$  (the distance between C111-S $\gamma$  and P1-C atoms), CV2:  $d_{H272-H\delta-P1'-N}$  (the distance between H272-H $\delta$  and P1'-N atoms). Dash line represents the position of the transition state.

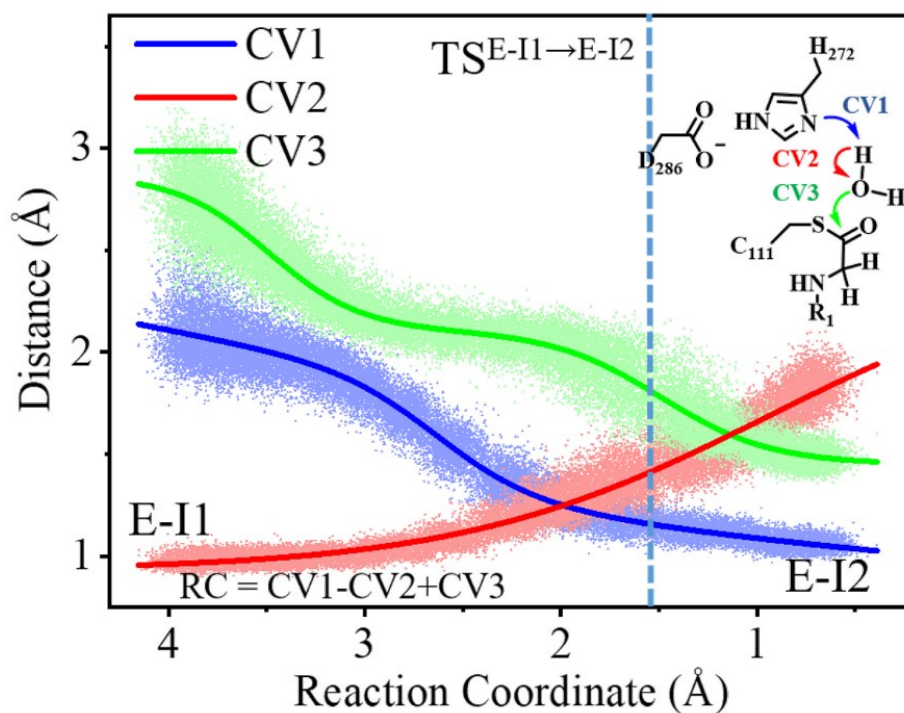

**Fig. S10** Evolution of the distances selected as the collective variables (CVs) along the reaction coordinate of the E-I1  $\rightarrow$  E-I2 substep of the deacylation reaction in path I. CV1:  $d_{\text{H}_{272}\text{-N}\delta\text{-water-H}}$  (the distance between H<sub>272</sub>-N $\delta$  atom and the hydrogen of deacylating water), CV2:  $d_{\text{water-O-water-H}}$  (the distance between the oxygen and hydrogen atoms of deacylating water), CV3:  $d_{\text{water-O-P1-C}}$  (the distance between the oxygen of deacylating water and P1-C). Dash line represents the position of the transition state.

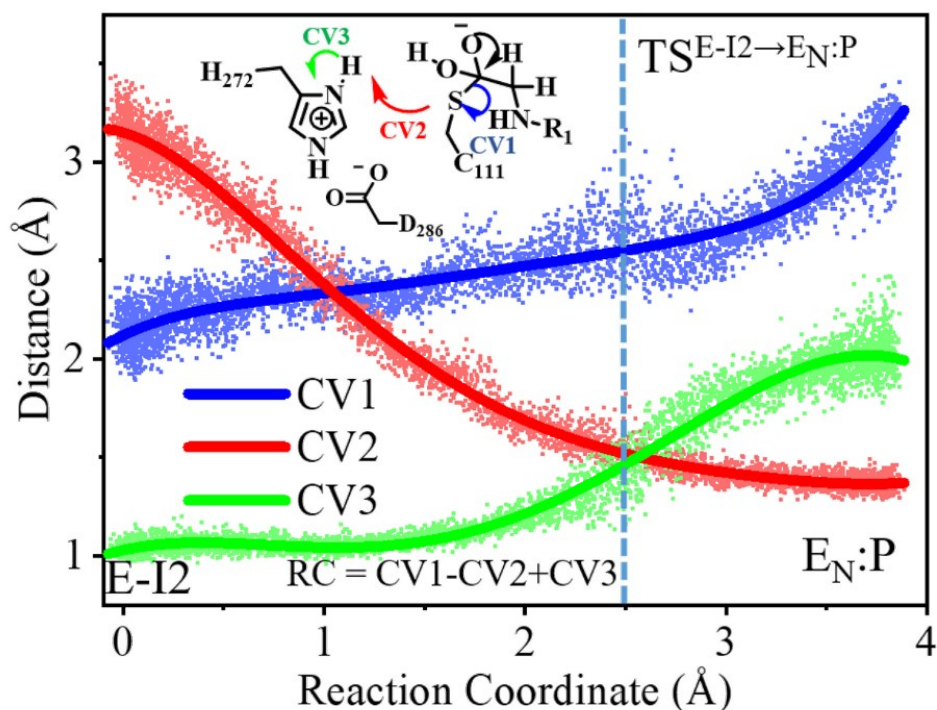

**Fig. S11** Evolution of the distances selected as the collective variables (CVs) along the reaction coordinate of the E-I2 → E<sub>N</sub>:P substep of the deacylation reaction in path I. CV1:  $d_{\text{C}_{111}\text{-S}_{\gamma}\text{-P1-C}}$  (the distance between C<sub>111</sub>-S<sub>γ</sub> and P1-C atoms), CV2:  $d_{\text{C}_{111}\text{-S}_{\gamma}\text{-H}_{272}\text{-H}_{\delta}}$  (the distance between C<sub>111</sub>-S<sub>γ</sub> and H<sub>272</sub>-H<sub>δ</sub> atoms), CV3:  $d_{\text{H}_{272}\text{-H}_{\delta}\text{-H}_{272}\text{-N}_{\delta}}$  (the distance between H<sub>272</sub>-H<sub>δ</sub> and H<sub>272</sub>-N<sub>δ</sub> atoms). Dash line represents the position of the transition state.

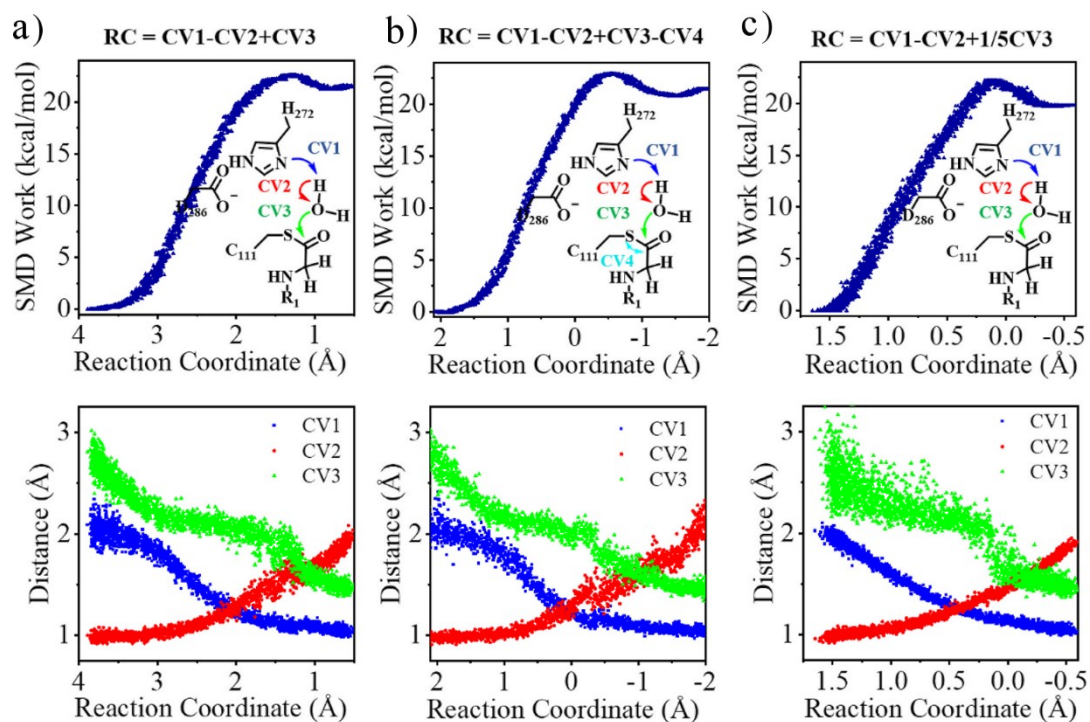

**Fig. S12** The QM/MM SMD work applied for the completion of the E-I1  $\rightarrow$  E-I2 substep of the deacylation transition in path I along multiple predefined reaction coordinates, and the evolution of the distances selected as the collective variables (CVs) along the corresponding reaction coordinates.

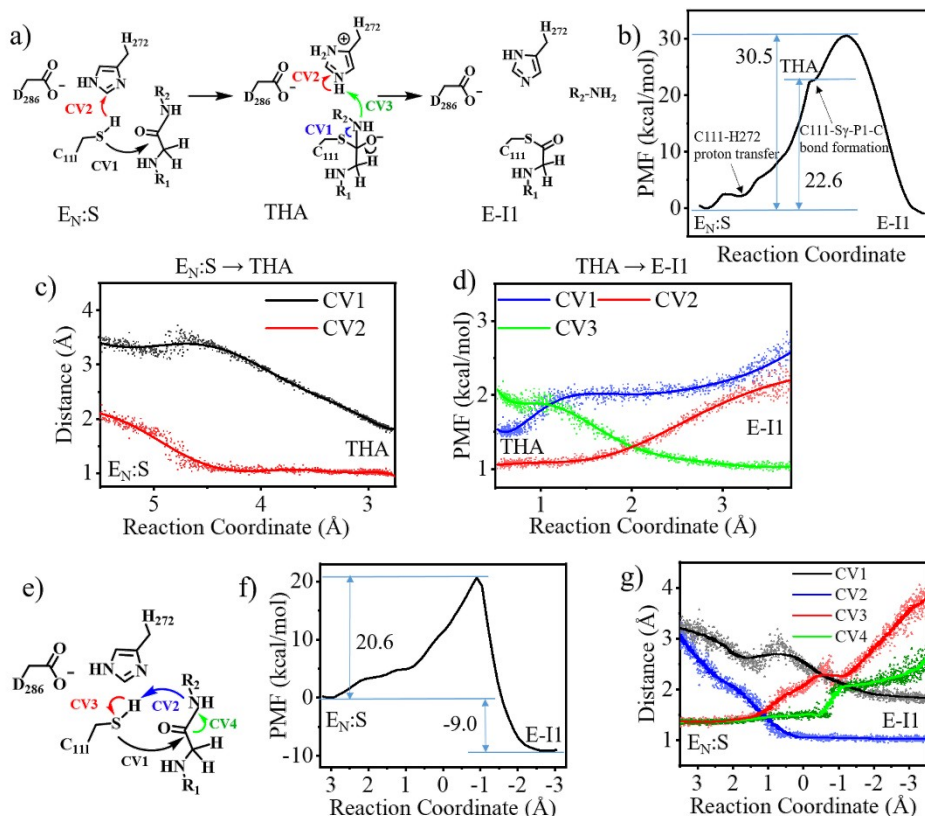

**Fig. S13** (a) Scheme indicating a possible molecular mechanism of acylation with a concerted process of C111-S $\gamma$  attack to the substrate P1-C and the C111-H272 proton transfer. In this case, the acylation is proceeded by two substeps of  $E_N:S \rightarrow \text{THA}$  and  $\text{THA} \rightarrow E-I1$ . THA is a transient thiohemiketal state. (b) The QM/MM free energy profile associated with the acylation as described in (a). In the profile, the arrows show the positions where the C111-H272 proton transfer and the C111-S $\gamma$ -P1-C bond formation occur. (c-d) Evolution of the selected collective variables (CVs) in the two substeps of acylation, respectively. In the  $E_N:S \rightarrow \text{THA}$  substep, the reaction coordinate is defined as  $\text{RC} = \text{CV1} + \text{CV2}$ . CV1: the distance between C111-S $\gamma$  and P1-C atoms, CV2: the distance between C111-H $\gamma$  and H272-N $\delta$  atoms. In the  $\text{THA} \rightarrow E-I1$  substep, the reaction coordinate is defined as  $\text{RC} = \text{CV1} + \text{CV2} - \text{CV3}$ . CV1: the distance

between P1-C and P1'-N atoms, CV2: the distance between H272-N $\delta$  and H272-H $\delta$  atoms, CV3: the distance between P1'-N and H272-H $\delta$ .

(e) Scheme indicating a possible molecular mechanism of acylation with a concerted process of C111-S $\gamma$  attack to the substrate P1-C and the proton transfer from C111-H $\gamma$  to P1'-N. H272 is not involved in such a concerted acylation reaction between C111 and substrate. (f) The QM/MM free energy profile associated with the acylation as described in (e), with the reaction coordinate defined as  $RC = CV1 + CV2 - CV3 - CV4$ . CV1: the distance between C111-S $\gamma$  and P1-C atoms, CV2: the distance between P1'-N and C111-H $\gamma$  atoms, CV3: the distance between C111-S $\gamma$  and C111-H $\gamma$  atoms, CV4: the distance between P1-C and P1'-N atoms. (g) Evolution of the CVs along the reaction coordinate.

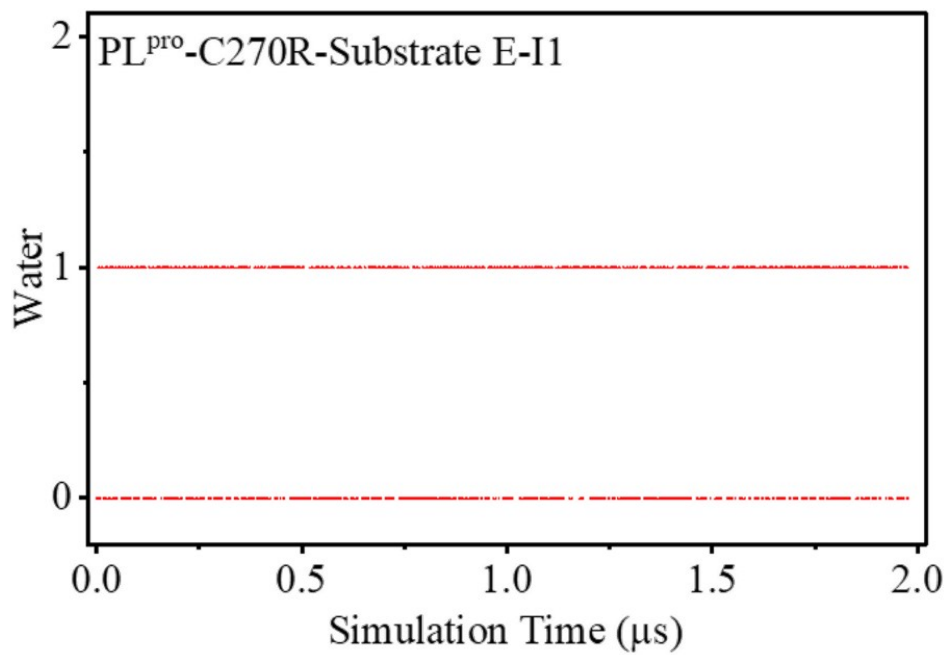

**Fig. S14** A cMD simulation trajectory indicating the presence of water in between H272 and the carbonyl carbon of the substrate that is ready for the deacylation reaction for the substrate-bound PL<sup>pro</sup> C270R mutant system.



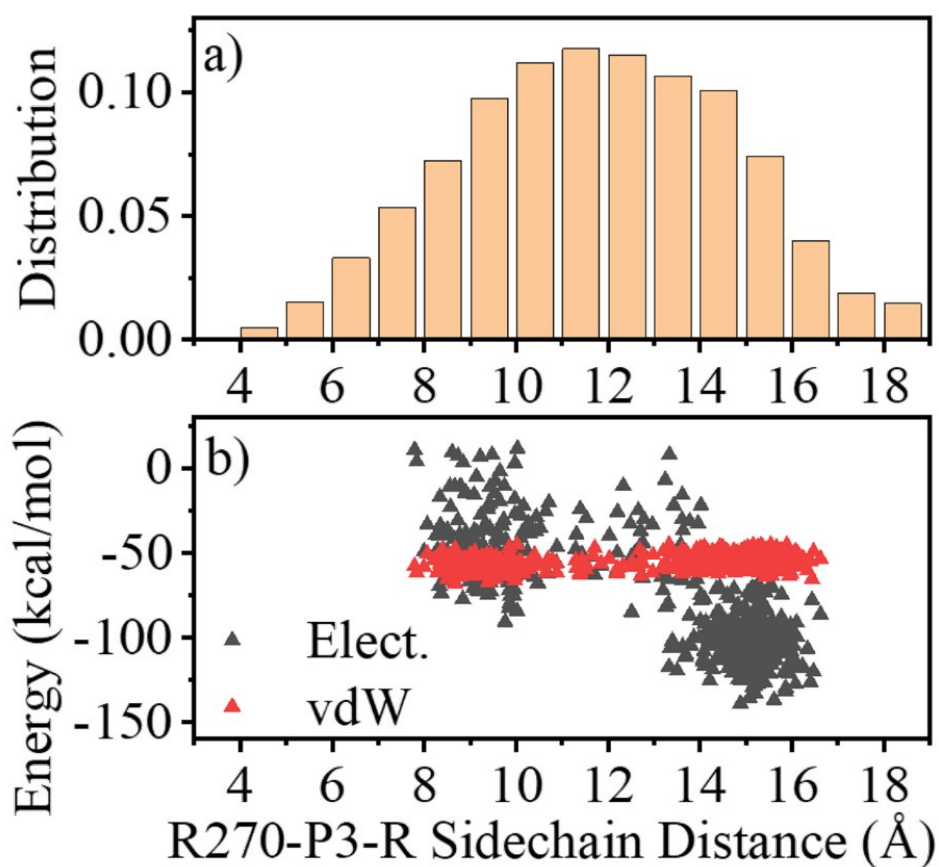

**Fig. S15** (a) The distribution of the sidechain distance between PL<sup>pro</sup> R270 and the arginine at the P3 site (P3-R) of the substrate in the GaMD simulation of C270R-mutated SARS-CoV-2 PL<sup>pro</sup>-substrate complex. (b) The distribution of the PL<sup>pro</sup>-substrate electrostatic and vdW interaction energy along the sidechain distance between R270 and P3-R collected from the frames of the MM/PBSA calculation of C270R-mutated SARS-CoV-2 PL<sup>pro</sup>-substrate complex.

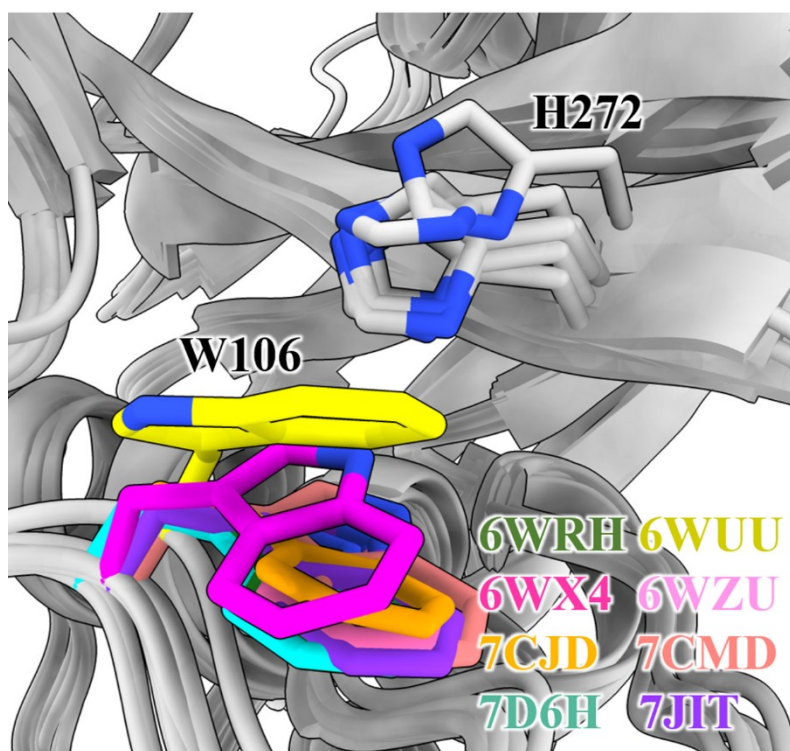

**Fig. S16** Superposition of SARS-CoV-2 PL<sup>pro</sup> crystal structures indicating the conformation diversity of W106 sidechain.

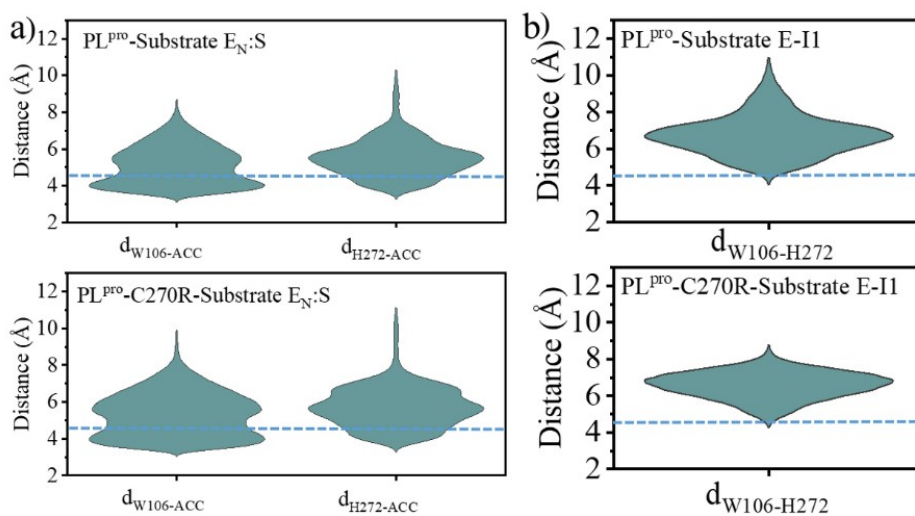

**Fig. S17** (a) The ranges of the distance between the W106 sidechain and the coumarin skeleton of the ACC group of the substrate ( $d_{W106-ACC}$ ), and the distance between the H272 sidechain and the coumarin skeleton of the ACC ( $d_{H272-ACC}$ ) in the substrate-bound complexes of wild-type PL<sup>pro</sup> and C270R mutant (E<sub>N</sub>:S). (b) The ranges of the W106-H272 sidechain distances in the E-I1 intermediates of the wild-type PL<sup>pro</sup> and C270R mutant. Dash lines at 4.5 Å indicate the formation of  $\pi$ - $\pi$  interaction.

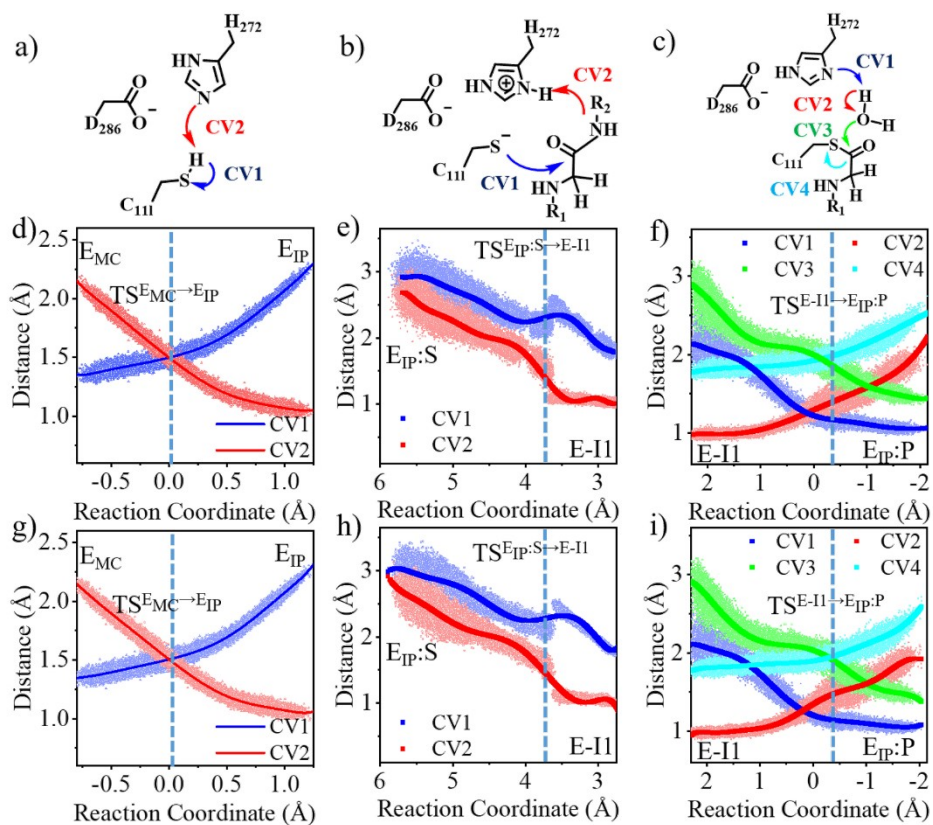

**Fig. S18** (a-c) The schemes indicating the collective variables (CVs) for the reactions of C111-H272 proton transfer, acylation and deacylation. (d-f) Evolution of the CVs along the reactions for wild-type SARS-CoV-2 PL<sup>pro</sup>. (g-i) Evolution of the CVs along the reactions for C270R mutated SARS-CoV-2 PL<sup>pro</sup>. In each panel, a dash line represents the position of the transition state. The evolution of the CVs for the C111-H272 proton transfer is for apo PL<sup>pro</sup>.

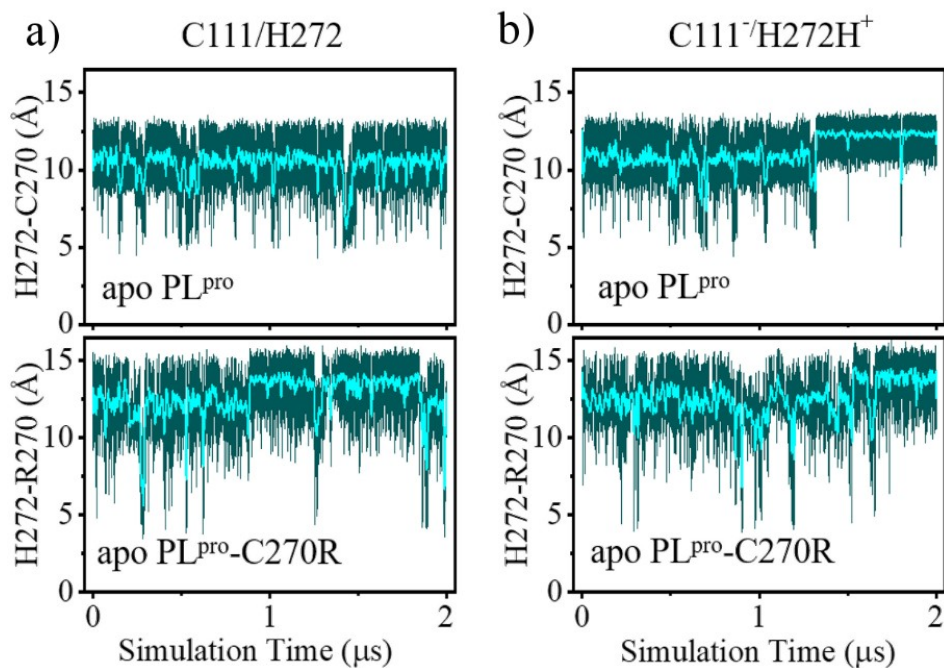

**Fig. S19** GaMD simulation trajectories of apo wild-type SARS-CoV-2 PL<sup>pro</sup> and C270R mutant containing (a) the neutral form of C111/H272 and (b) the ion pair form of C111<sup>-</sup>/H272H<sup>+</sup>. The trajectories are represented by the time series of the sidechain distance between H272 and C270/R270 (from top to bottom).

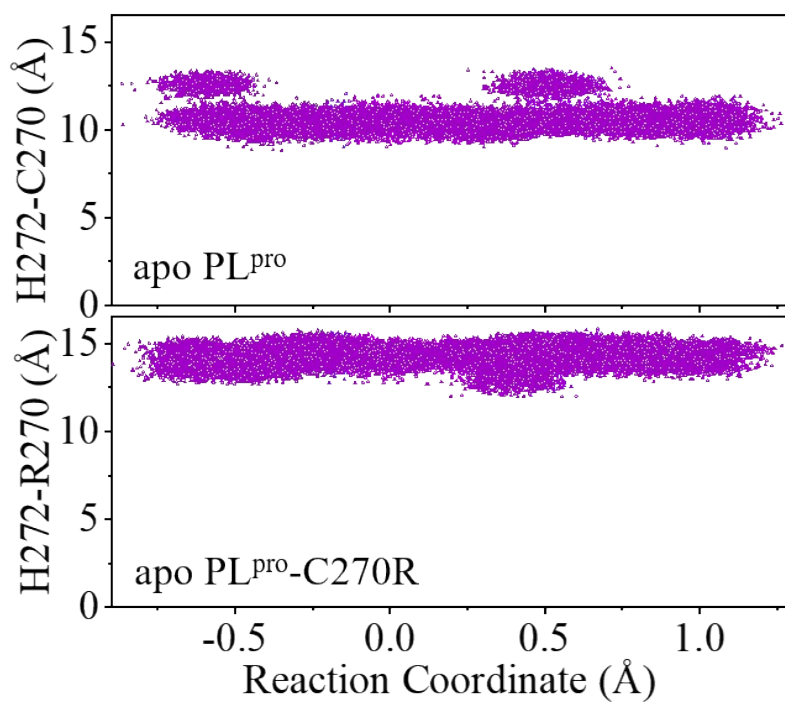

**Fig. S20** The distribution of the sidechain distance of H272 to C270/R270 along the reaction coordinate of the C111–H272 proton transfer in the QM/MM systems of apo wild-type SARS-CoV-2 PL<sup>pro</sup> and the C270R mutant.

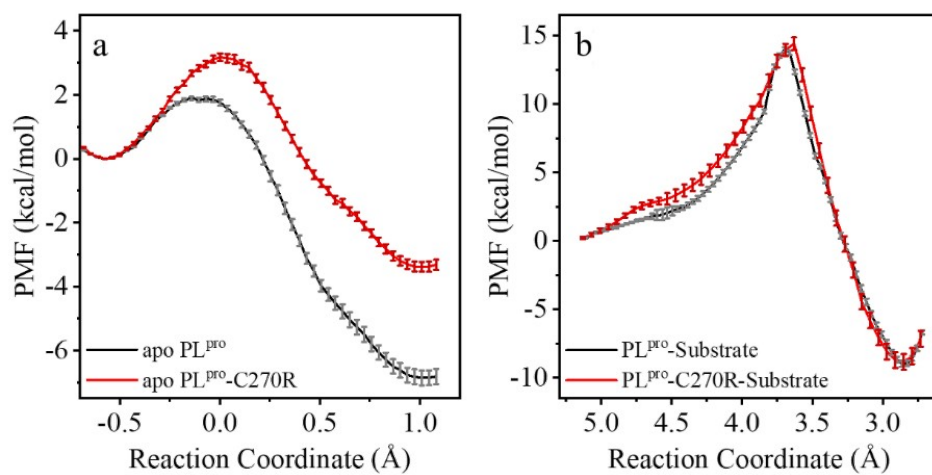

**Fig. S21** Error bars estimating the QM/MM simulation convergence for (a) the C111-H272 proton transfer and (b) acylation reactions of the wild-type SARS-CoV-2 PL<sup>pro</sup> and C270R mutant.

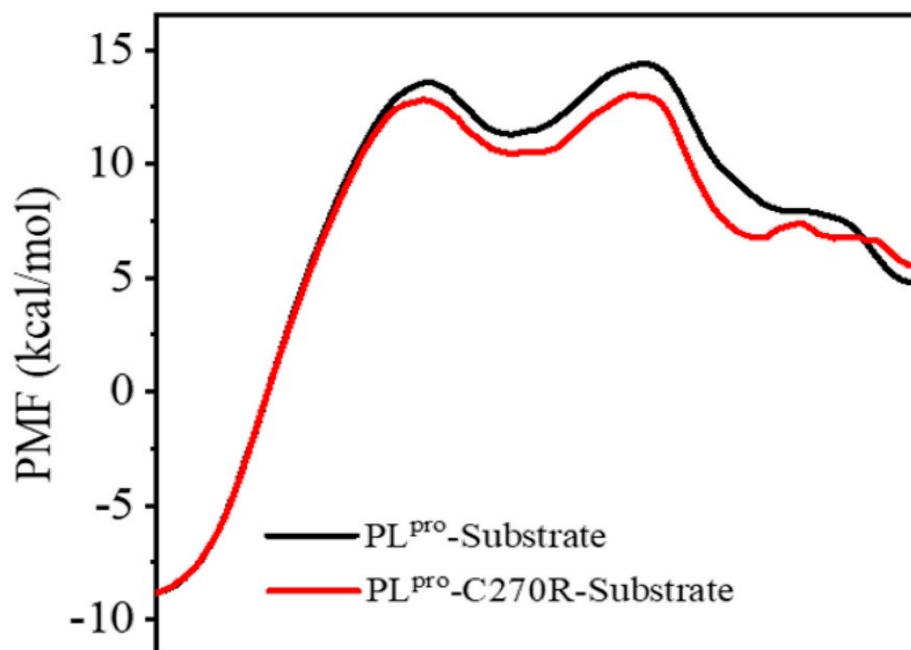

**Fig. S22** Superposition of the QM/MM free energy profiles associated with the deacylation reaction as proposed in path I (Fig. 1) for the wild-type SARS-CoV-2 PL<sup>pro</sup> and C270R mutant reacting with the substrate.
